# Supplementary material for: Europe PMC in 2020
Source: PubMed Central journal article supplement (PMC7778976; doi:10.1093/nar/gkaa994), 2020-11-12
Supplement: gkaa994_supplemental_file.pdf [file gkaa994_supplemental_file.pdf]

**Europe PMC mines accession numbers & resource names for the databases listed.**

| <b>Resource(s)</b>                    | <b>Accession number</b> | <b>Resource name</b> |
|---------------------------------------|-------------------------|----------------------|
| <a href="#">ArrayExpress</a>          | •                       | •                    |
| <a href="#">BioModels</a>             | •                       | •                    |
| <a href="#">BioProject</a>            | •                       |                      |
| <a href="#">BioSamples</a>            | •                       | •                    |
| <a href="#">BioStudies</a>            | •                       | •                    |
| <a href="#">BRENDA</a>                |                         | •                    |
| <a href="#">CATH</a>                  | •                       | •                    |
| <a href="#">ChEBI</a>                 | •                       | •                    |
| <a href="#">ChEMBL</a>                | •                       | •                    |
| <a href="#">Complex Portal</a>        | •                       | •                    |
| <a href="#">dbGap</a>                 | •                       |                      |
| <a href="#">DOI</a>                   | •                       |                      |
| <a href="#">EBI Metagenomics</a>      | •                       | •                    |
| <a href="#">EBISC</a>                 | •                       |                      |
| <a href="#">EFO</a>                   | •                       | •                    |
| <a href="#">EGA</a>                   | •                       | •                    |
| <a href="#">EMDB</a>                  | •                       | •                    |
| <a href="#">EMPIAR</a>                | •                       | •                    |
| <a href="#">ENA</a>                   | •                       | •                    |
| <a href="#">Ensembl</a>               | •                       | •                    |
| <a href="#">Ensembl Genomes</a>       |                         | •                    |
| <a href="#">Enzyme Portal</a>         |                         | •                    |
| <a href="#">EudraCT</a>               | •                       |                      |
| <a href="#">Europe PMC</a>            |                         | •                    |
| <a href="#">EVA</a>                   | •                       | •                    |
| <a href="#">Expression Atlas</a>      |                         | •                    |
| <a href="#">GCA</a>                   | •                       |                      |
| <a href="#">GEO</a>                   | •                       |                      |
| <a href="#">GISAID</a>                | •                       |                      |
| <a href="#">GO</a>                    | •                       | •                    |
| <a href="#">GWAS Catalog</a>          |                         | •                    |
| <a href="#">HGNC</a>                  | •                       | •                    |
| <a href="#">HipSci</a>                | •                       |                      |
| <a href="#">Human Protein Atlas</a>   | •                       | •                    |
| <a href="#">Identifiers.org</a>       |                         | •                    |
| <a href="#">IGSR/1000 genomes</a>     | •                       | •                    |
| <a href="#">Intact</a>                | •                       | •                    |
| <a href="#">Intenz</a>                | •                       | •                    |
| <a href="#">InterPro</a>              | •                       | •                    |
| <a href="#">Metabolights</a>          | •                       | •                    |
| <a href="#">MINT</a>                  | •                       | •                    |
| <a href="#">Mouse Resources</a>       | •                       | •                    |
| <a href="#">NIH ClinicalTrials</a>    | •                       |                      |
| <a href="#">OLS</a>                   |                         | •                    |
| <a href="#">OMIM</a>                  | •                       |                      |
| <a href="#">Orphadata</a>             | •                       | •                    |
| <a href="#">PDBe</a>                  | •                       | •                    |
| <a href="#">Pfam</a>                  | •                       | •                    |
| <a href="#">PRIDE/ProteomeXchange</a> | •                       | •                    |

|                            |   |   |
|----------------------------|---|---|
| <a href="#">Reactome</a>   | • | • |
| <a href="#">RefSeq</a>     | • |   |
| <a href="#">RefSNP</a>     | • |   |
| <a href="#">Rfam</a>       | • | • |
| <a href="#">RNACentral</a> | • | • |
| <a href="#">RRID</a>       | • |   |
| <a href="#">SILVA</a>      |   | • |
| <a href="#">STRING-db</a>  |   | • |
| <a href="#">SureChEMBL</a> |   | • |
| <a href="#">Treefam</a>    | • |   |
| <a href="#">UniProt</a>    | • | • |
| <a href="#">VectorBase</a> |   | • |
| <a href="#">WormBase</a>   |   | • |
